# Supplementary material
Source: HighWire-hosted journal article supplement (https://www.cmaj.ca/highwire/filestream/59117/field_highwire_adjunct_files/1/five-ebola-2-at.pdf)
Supplement: five-ebola-2-at.pdf [file five-ebola-2-at.pdf]

## References

1. Baize S, Pannetier D, Oestereich L, et al. Emergence of Zaire Ebola virus disease in Guinea — preliminary report. *N Engl J Med* 2014; Apr. 16 [Epub ahead of print].
2. Ebola virus disease, West Africa — update. Geneva: World Health Organization; 2014. Available: [www.who.int/csr/don/2014\\_08\\_15\\_ebola/en/#content](http://www.who.int/csr/don/2014_08_15_ebola/en/#content) (accessed 2014 Aug. 15).
3. Feldmann H, Geisbert T. Ebola haemorrhagic fever. *Lancet* 2011;377:849-62.
4. Ebola virus: pathogen safety data sheet — infectious substances. Ottawa: Public Health Agency of Canada; 2010. Available: [www.phac-aspc.gc.ca/lab-bio/res/psds-ftss/ebola-eng.php](http://www.phac-aspc.gc.ca/lab-bio/res/psds-ftss/ebola-eng.php) (accessed 2014 July 31).
5. Wilson ME, Weld L, Boggild A, et al. Fever in returned travelers: results from the GeoSentinel Surveillance Network. *Clin Infect Dis* 2007;44:1560-8.
